# Supplementary material
Source: PubMed Central journal article supplement (PMC5135638)

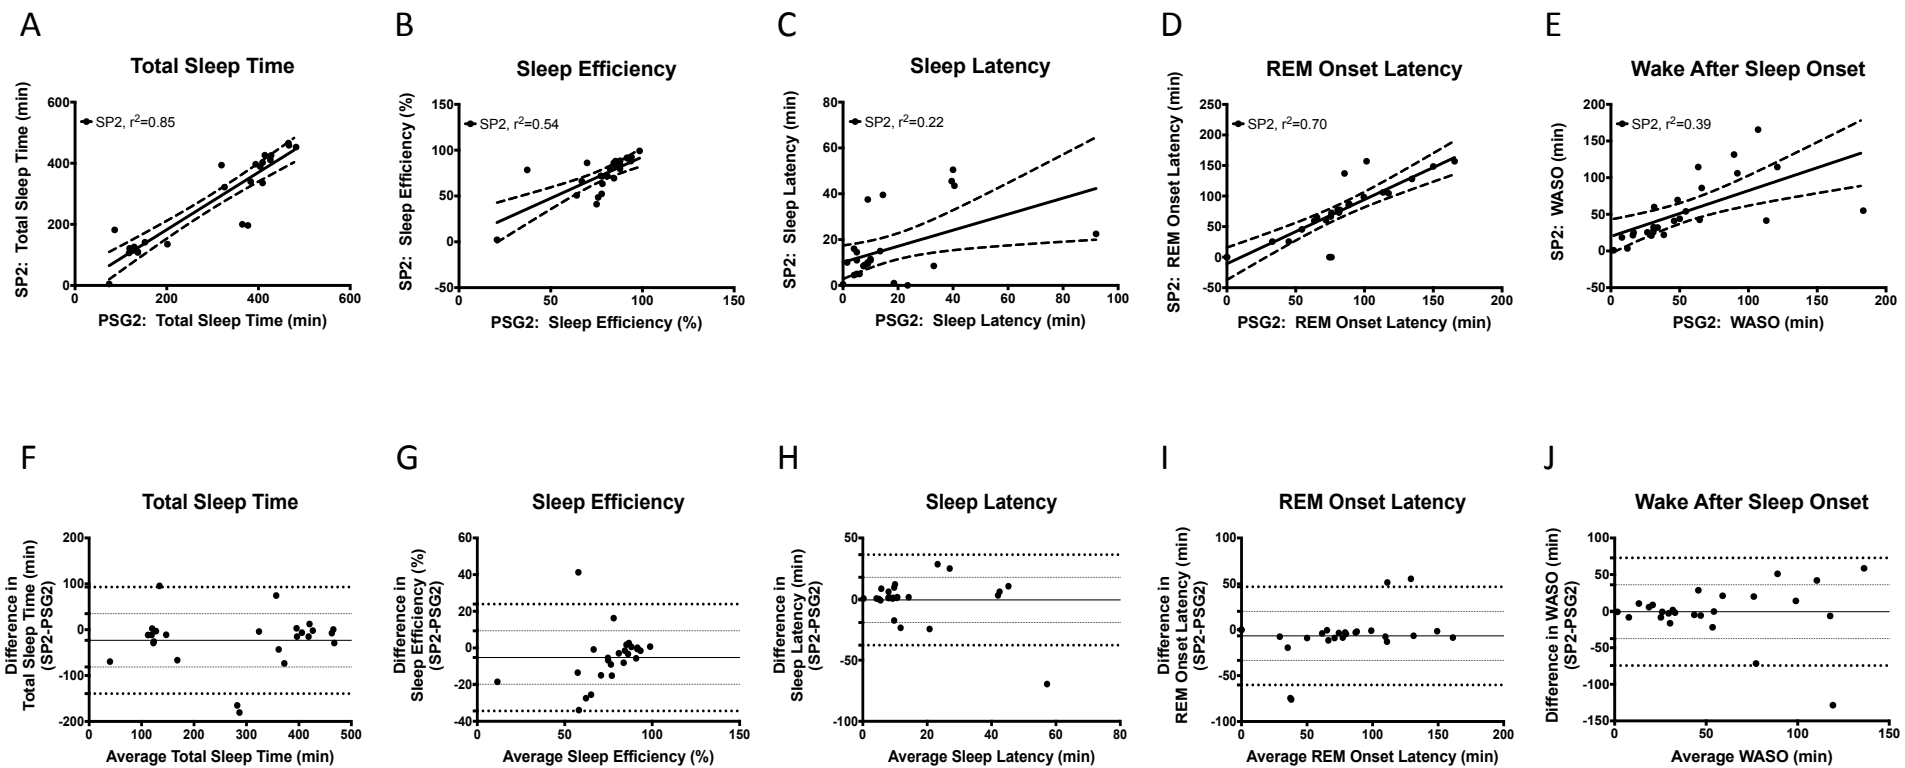

Supplement: NIHMS775200-supplement-Supp_Fig_S1.pdf [file NIHMS775200-supplement-Supp_Fig_S1.pdf]

**A**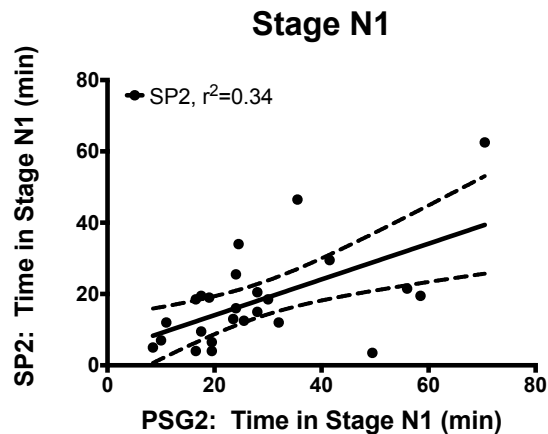**B**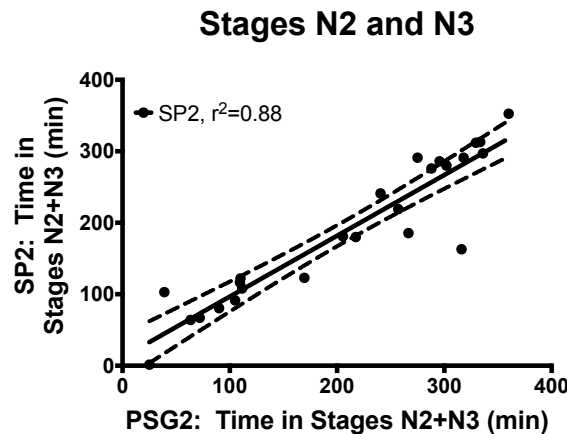**C**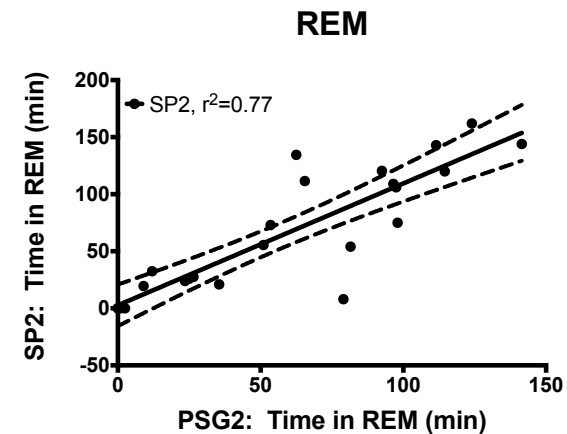**D**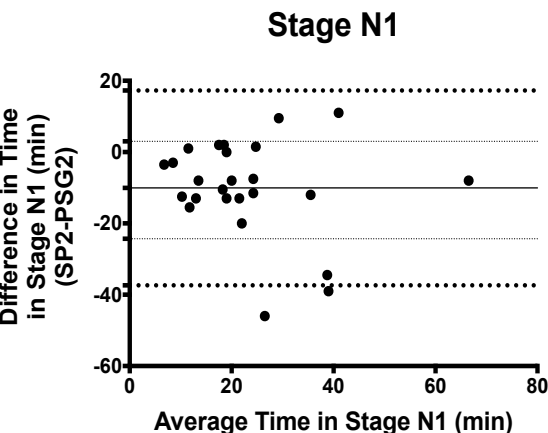**E**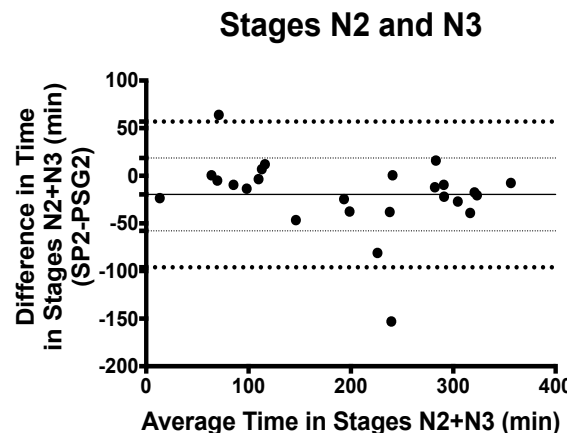**F**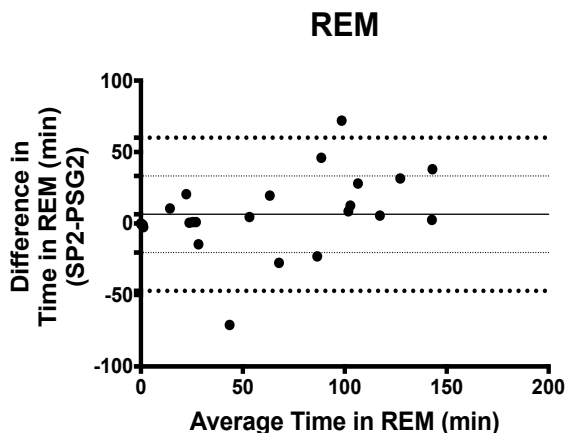

Supplement: NIHMS775200-supplement-Supp_Fig_S2.pdf [file NIHMS775200-supplement-Supp_Fig_S2.pdf]
